# Supplementary material
Source: MDPI journal article supplement (https://www.mdpi.com/2227-9040/9/7/174)
Supplement: s1 [file s1 › chemosensors-1220909-supplementary.pdf]

# Graphene Bioelectronic Nose for the Detection of Odorants with Human Olfactory Receptor 2AG1

Danielle M. Goodwin <sup>1,\*</sup>, Ffion Walters <sup>1</sup>, Muhammad Munem Ali <sup>1</sup>, Ehsaneh Daghigh Ahmadi <sup>1</sup> and Owen J. Guy <sup>1,2,\*</sup>

- <sup>1</sup> Centre for NanoHealth, College of Engineering, Swansea University, Swansea SA2 8PP, UK; 1914696@swansea.ac.uk (D.M.G.); f.a.walters@swansea.ac.uk (F.W.); m.m.ali@swansea.ac.uk (M.M.A.); E.Daghighahmadi@Swansea.ac.uk (E.D.A.)
- <sup>2</sup> Department of Chemistry, College of Science, Swansea University, Swansea SA2 8PP, UK
- \* Correspondence: 1914696@swansea.ac.uk (D.M.G.); o.j.guy@swansea.ac.uk (O.J.G.); Tel.: +44-(0)1-792513181 (O.J.G.)

**Table 1.** Root Mean Square (RMS) roughness data of bare graphene (blank) and after functionalization using DAN.

| Scan number | Blank/DAN | RMS      | Scan number | Blank/DAN | RMS      |
|-------------|-----------|----------|-------------|-----------|----------|
| 1           | Blank     | 802.1 pm | 16          | Blank     | 897.6 pm |
| 2           | Blank     | 825.0 pm | 17          | Blank     | 662.7 pm |
| 3           | Blank     | 944.1 pm | 18          | Blank     | 684.4 pm |
| 4           | Blank     | 857.5 pm | 19          | Blank     | 648.8 pm |
| 5           | Blank     | 974.9 pm | 20          | Blank     | 621.6 pm |
| 6           | Blank     | 788.1 pm | 21          | Blank     | 686.8 pm |
| 7           | Blank     | 725.2 pm | 22          | Blank     | 580.4 pm |
| 8           | Blank     | 644.7 pm | 23          | Blank     | 570.4 pm |
| 9           | Blank     | 725.2 pm | 24          | Blank     | 534.3 pm |
| 10          | Blank     | 1.228 nm | 25          | Blank     | 732.4 pm |
| 11          | Blank     | 616.3 pm | 26          | Blank     | 717.3 pm |
| 12          | Blank     | 621.6 pm | 27          | Blank     | 570.4 pm |
| 13          | Blank     | 1.052 nm | 28          | Blank     | 767.9 pm |
| 14          | Blank     | 739.5 pm | 29          | Blank     | 723.4 pm |
| 15          | Blank     | 867.3 pm | 30          | Blank     | 783.0 pm |

  

| Scan number | Blank/DAN | RMS      | Scan number | Blank/DAN | RMS      |
|-------------|-----------|----------|-------------|-----------|----------|
| 31          | Blank     | 534.3 pm | 46          | DAN       | 961.8 pm |
| 32          | Blank     | 701.4 pm | 47          | DAN       | 843.9 pm |
| 33          | Blank     | 497.1 pm | 48          | DAN       | 1.030 nm |
| 34          | Blank     | 724.9 pm | 49          | Blank     | 1.191 nm |
| 35          | Blank     | 708.8 pm | 50          | Blank     | 1.077 nm |
| 36          | DAN       | 2.315 nm | 51          | Blank     | 1.040 nm |
| 37          | DAN       | 2.309 nm | 52          | Blank     | 1.007 nm |
| 38          | DAN       | 2.189 nm | 53          | Blank     | 1.118 nm |
| 39          | DAN       | 1.306 nm | 54          | DAN       | 1.063 nm |
| 40          | DAN       | 1.106 nm | 55          | DAN       | 852.9 pm |
| 41          | DAN       | 1.024 nm | 56          | DAN       | 970.3 pm |
| 42          | DAN       | 804.8 pm | 57          | DAN       | 829.4 pm |
| 43          | DAN       | 952.6 pm | 58          | DAN       | 817.9 pm |
| 44          | DAN       | 1.044 nm | 59          | DAN       | 763.1 pm |
| 45          | DAN       | 1.072 nm | 60          | DAN       | 763.5 pm |

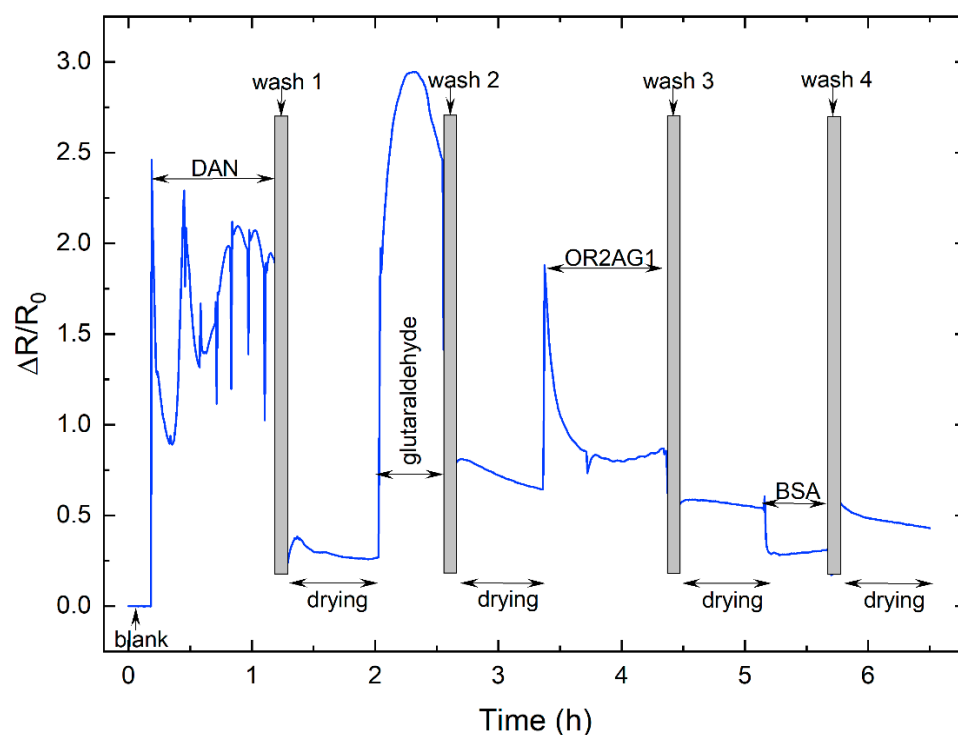

**Figure S1.** Real-time resistance measurements of the graphene functionalization process. Where  $\Delta R/R_0 = R_{\text{device}} - R_0/R_0$  and  $R_0$  is the resistance at  $T = 0$  (resistance of bare (intrinsic) graphene).

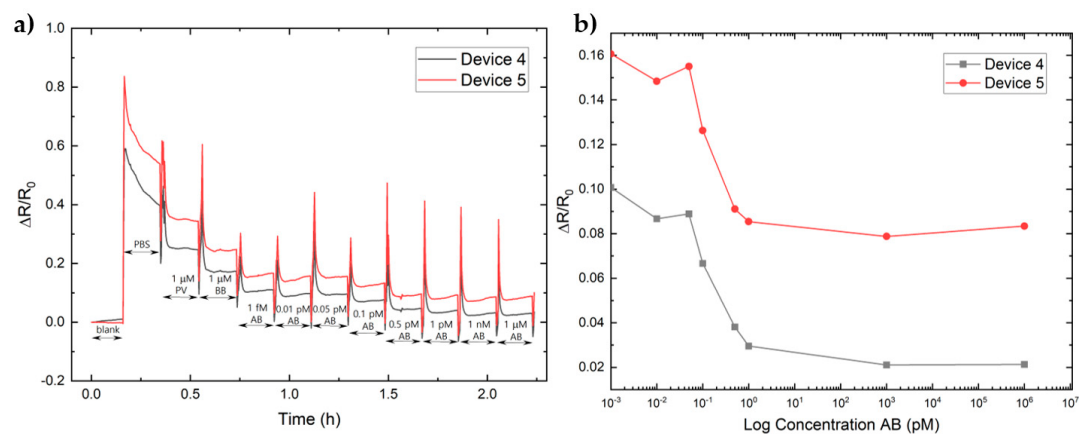

**Figure S2.** (a) Real-time resistance measurements of the OR2AG1 functionalized graphene sensor. Where  $\Delta R/R_0 = R_{\text{device}} - R_0/R_0$  and  $R_0$  is the resistance at  $T = 0$  (resistance of OR2AG1 functionalized graphene). (b) Picomolar amyl butyrate concentration (logarithmic scale) plotted against resistance.

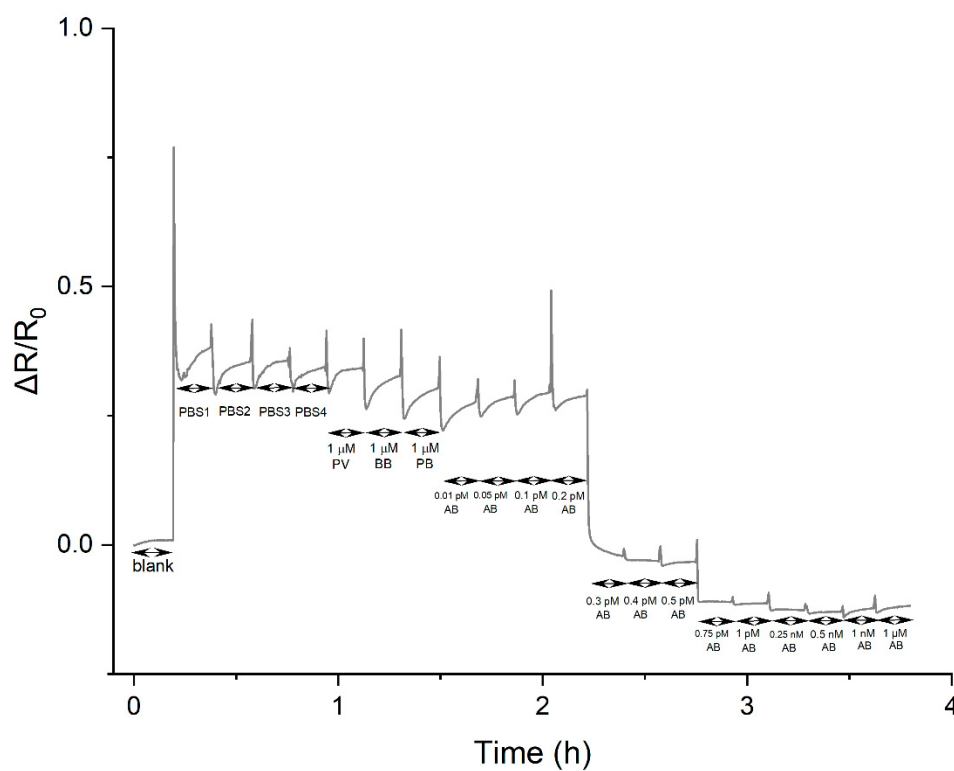

**Figure S3.** Real-time resistance measurements of the OR2AG1 functionalized graphene sensor. Where  $\Delta R/R_0 = R_{\text{device}} - R_0/R_0$  and  $R_0$  is the resistance at  $T = 0$  (resistance of OR2AG1 functionalized graphene).
